# Supplementary material
Source: Springer Nature journal article supplement (https://www.springermedizin.de/resource/supplementary/12943_2011_899_MOESM15_ESM.pdf/9551956)

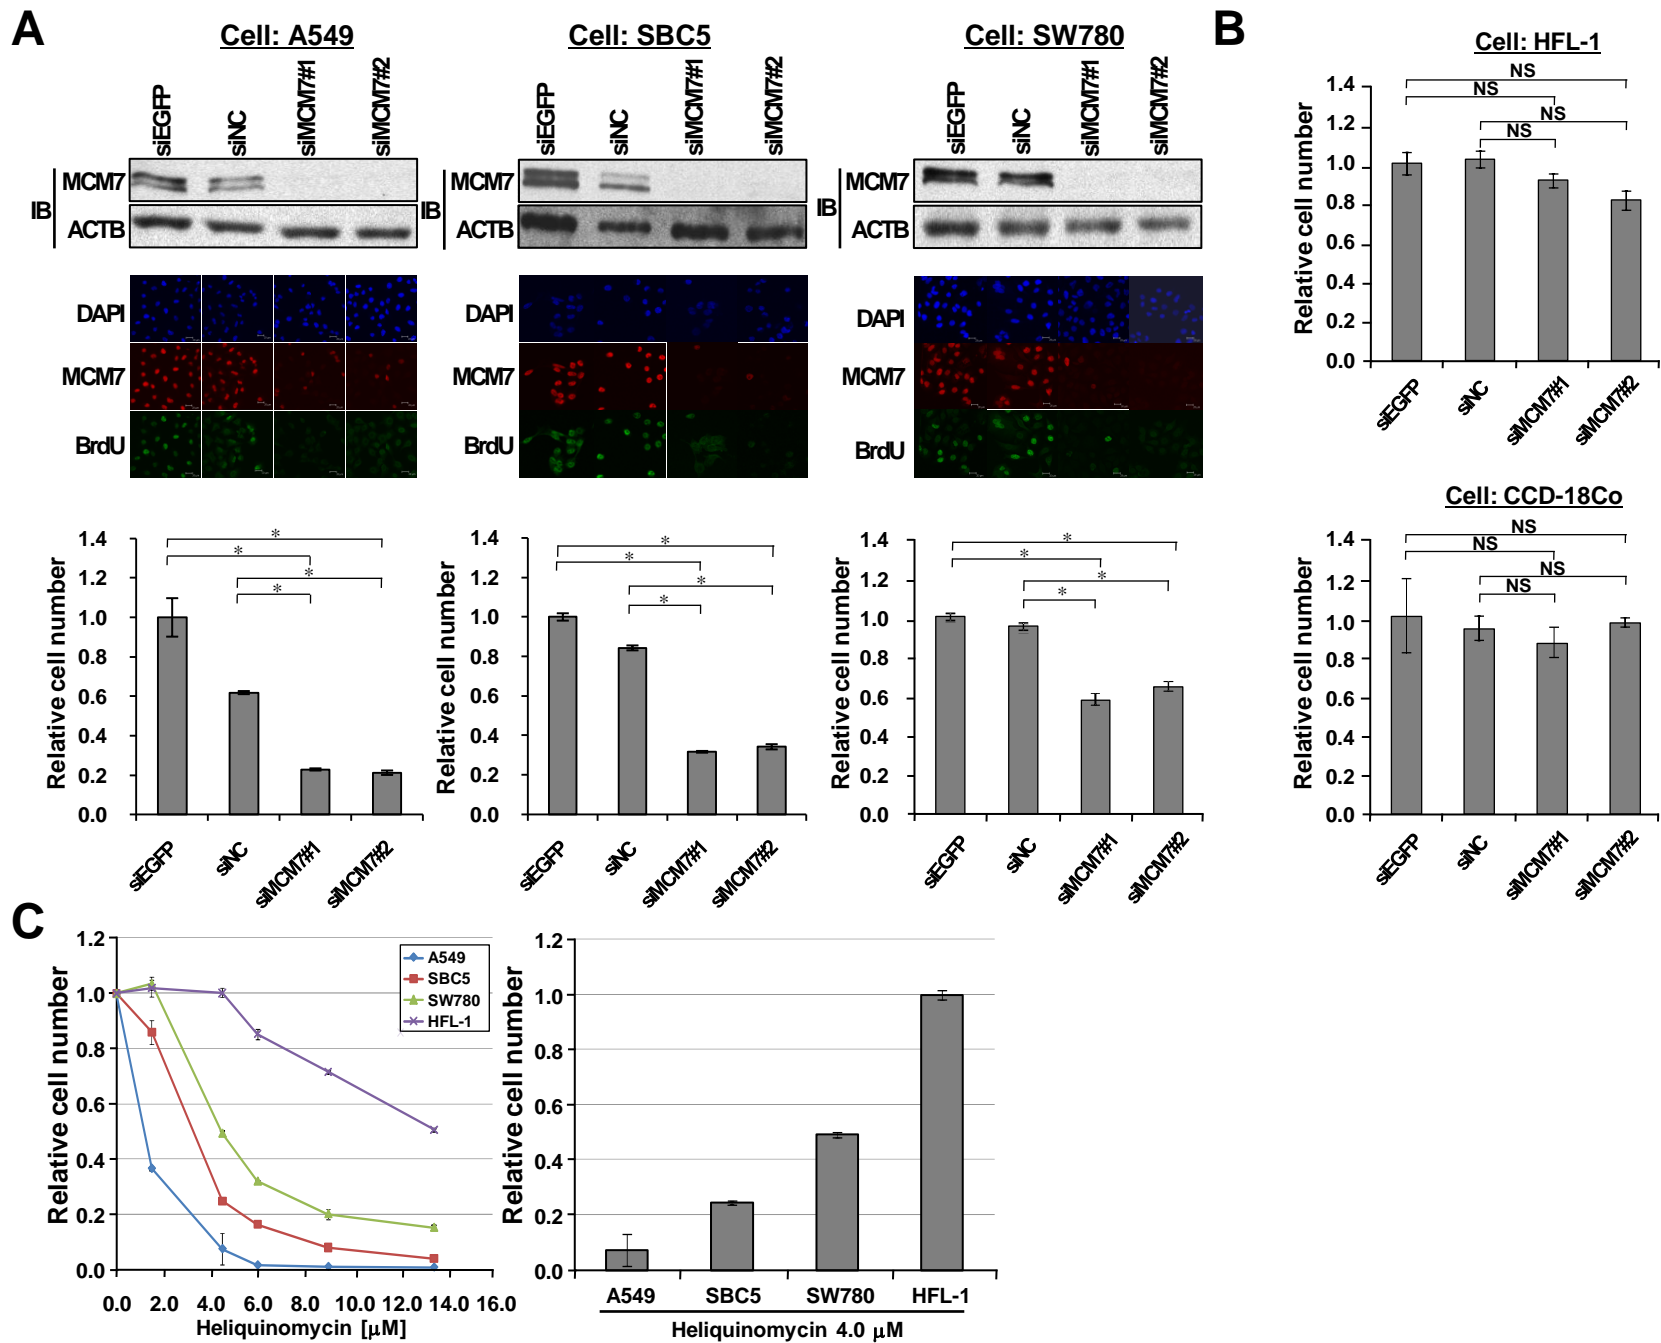

Supplement: MOESM15 [file 9551956]
